# Supplementary material for: Physicochemical Characterization and Drug Release Properties of Methyl-Substituted Silica Xerogels Made Using Sol–Gel Process
Source: MDPI journal article supplement (doi:10.3390/ijms22179197), 2021-08-25
Supplement: s1 [file s1]

## A.1. Results

**Table S1.** Texture properties of the methyl substituted silica gels.

| Sample<br>(mol% MTES) | Hysteresis<br>Type | Acid<br>Catalysts | DFT<br>(nm) | S <sub>BET</sub> <sup>a</sup><br>(m <sup>2</sup> /g) | S <sub>BET</sub> <sup>b</sup><br>(m <sup>2</sup> /g) | V <sub>micro</sub><br>(cm <sup>3</sup> /g) | V <sub>total</sub><br>(cm <sup>3</sup> /g) |
|-----------------------|--------------------|-------------------|-------------|------------------------------------------------------|------------------------------------------------------|--------------------------------------------|--------------------------------------------|
| 0                     | H2a                | A                 | 4.72        | 448                                                  | 494                                                  | 0.133                                      | 0.373                                      |
|                       | H3                 | B                 | 32.65       | 291                                                  | 283                                                  | 0.110                                      | 0.562                                      |
| 5                     | H2a                | A                 | 3.06        | 563                                                  | 608                                                  | 0.168                                      | 0.385                                      |
|                       | H2a                | B                 | 13.46       | 669                                                  | 696                                                  | 0.238                                      | 1.304                                      |
| 10                    | H2a                | A                 | 3.06        | 556                                                  | 604                                                  | 0.166                                      | 0.360                                      |
|                       | H2a                | B                 | 7.3         | 777                                                  | 813                                                  | 0.266                                      | 0.945                                      |
| 20                    | H2a                | A                 | 3.06        | 588                                                  | 627                                                  | 0.221                                      | 0.335                                      |
|                       | H2a                | B                 | 5.09        | 859                                                  | 893                                                  | 0.307                                      | 0.720                                      |
| 30                    | H2a                | A                 | 2.5         | 541                                                  | 613                                                  | 0.239                                      | 0.304                                      |
|                       | H2a                | B                 | 4.89        | 930                                                  | 976                                                  | 0.324                                      | 0.728                                      |
| 40                    | H4                 | A                 | 1.38        | 527                                                  | 603                                                  | 0.248                                      | 0.299                                      |
|                       | H2a                | B                 | 5.09        | 1059                                                 | 1115                                                 | 0.356                                      | 0.931                                      |
| 50                    | H4                 | A                 | 1.38        | 457                                                  | 527                                                  | 0.230                                      | 0.252                                      |
|                       | H2a                | B                 | 5.29        | 851                                                  | 893                                                  | 0.303                                      | 0.799                                      |
| 60                    | H4                 | A                 | 2.03        | 616                                                  | 695                                                  | 0.269                                      | 0.351                                      |
|                       | H2a                | B                 | 4.89        | 895                                                  | 938                                                  | 0.332                                      | 0.704                                      |
| 70                    | H4                 | A                 | 2.03        | 409                                                  | 465                                                  | 0.197                                      | 0.2378                                     |
|                       | H4                 | B                 | 2.03        | 694                                                  | 722                                                  | 0.275                                      | 0.482                                      |
| 80                    | H4                 | A                 | 2.03        | 251                                                  | 265                                                  | 0.115                                      | 0.158                                      |
|                       | H4                 | B                 | 2.11        | 424                                                  | 438                                                  | 0.189                                      | 0.282                                      |

a – single point, b - multi point

**Table S2.** Average values of the pores and primary particles size obtained in small angle scattering measurements by fitting data with the unified exponential/power-law model.

| MTES<br>content (%) | Diameter (nm) |              |              |              |
|---------------------|---------------|--------------|--------------|--------------|
|                     | series A      |              | series B     |              |
|                     | SANS          | SAXS         | SANS         | SAXS         |
| 0                   | 10.35 ± 0.16  | 8.11 ± 0.19  | 53.59 ± 6.02 | 30.68 ± 4.35 |
| 5                   | 7.29 ± 0.09   | 6.34 ± 0.10  | 15.13 ± 0.35 | 11.39 ± 0.50 |
| 10                  | 5.64 ± 0.08   | 5.36 ± 0.04  | 9.68 ± 0.17  | 8.37 ± 0.19  |
| 20                  | 4.74 ± 0.11   | 4.65 ± 0.07  | 6.84 ± 0.14  | 6.34 ± 0.09  |
| 30                  | 8.17 ± 1.06   | 5.59 ± 1.02  | 6.48 ± 0.18  | 5.85 ± 0.15  |
| 40                  | 12.0 ± 2.21   | 8.60 ± 2.13  | 8.55 ± 0.31  | 7.59 ± 0.28  |
| 50                  | 15.02 ± 2.28  | 28.08 ± 2.18 | 10.54 ± 0.27 | 10.45 ± 0.24 |
| 60                  | 5.04 ± 0.63   | 5.38 ± 1.15  | 9.12 ± 0.45  | 9.28 ± 0.50  |
| 70                  | 11.17 ± 5.33  | 7.59 ± 3.12  | 8.85 ± 0.86  | 8.48 ± 0.91  |
| 80                  | 7.32 ± 1.32   | 6.89 ± 1.29  | 11.10 ± 4.25 | 9.69 ± 3.78  |

**Table S3.** XRD maxima position shift with the MTES mole percent

| Sample | Position | FWHM  | Height |
|--------|----------|-------|--------|
| A0     | 22.70    | 8.65  | 276.3  |
| A5     | 22.65    | 8.65  | 260.7  |
| A10    | 22.66    | 8.92  | 249.8  |
| A20    | 22.61    | 9.42  | 226.5  |
| A30    | 22.64    | 10.15 | 216.4  |
| A40    | 22.57    | 10.87 | 211.9  |
| A50    | 22.56    | 12.2  | 211.8  |
| A60    | 22.47    | 12.06 | 209.2  |
| A70    | 22.45    | 11.3  | 219.8  |
| A80    | 22.34    | 11.43 | 216.3  |
| B0     | 22.86    | 9.19  | 277.3  |
| B5     | 22.70    | 9.06  | 240.9  |
| B10    | 22.8     | 9.51  | 250.8  |
| B20    | 22.81    | 10.01 | 244.2  |
| B30    | 22.77    | 10.13 | 228.2  |
| B40    | 22.72    | 9.98  | 207.2  |
| B50    | 22.65    | 10.22 | 213.8  |
| B60    | 22.51    | 10.78 | 215.5  |
| B70    | 22.48    | 10.92 | 217.5  |
| B80    | 22.32    | 11.07 | 211.4  |

**Table S4.** Quantitative analysis of <sup>29</sup>Si MAS NMR spectra.

| Sample | <sup>29</sup> Si MAS NMR |                       |                       |          |                       |                       |                       |       |                                        |                                                         |                                                        |                                        |
|--------|--------------------------|-----------------------|-----------------------|----------|-----------------------|-----------------------|-----------------------|-------|----------------------------------------|---------------------------------------------------------|--------------------------------------------------------|----------------------------------------|
|        | Q <sup>4</sup><br>(%)    | Q <sup>3</sup><br>(%) | Q <sup>2</sup><br>(%) | Q<br>(%) | T <sup>3</sup><br>(%) | T <sup>2</sup><br>(%) | T <sup>1</sup><br>(%) | T (%) | Q <sup>4</sup> + T <sup>3</sup><br>(%) | Q <sup>4</sup> + T <sup>3</sup> +<br>Q <sup>3</sup> (%) | Q <sup>3</sup> +Q <sup>2</sup> +<br>T <sup>2</sup> (%) | Q <sup>2</sup> +<br>T <sup>2</sup> (%) |
| B0     | 70.5                     | 28.70                 | 0.82                  | 100      | 0                     | 0                     | -                     | 0     | 70.53                                  | 99.19                                                   | 29.48                                                  | 0.82                                   |
| B5     | 63.3                     | 32.30                 | 1.51                  | 97.20    | T3+T2 = 2.82          |                       | -                     | 2.82  | 66.16                                  | 98.49                                                   | 33.84                                                  | 1.51                                   |
| B10    | 65.6                     | 22.10                 | 0                     | 87.70    | 10.20                 | 2.11                  | -                     | 12.31 | 75.78                                  | 97.89                                                   | 24.22                                                  | 2.11                                   |
| B40    | 43.6                     | 14.80                 | 0.62                  | 58.9     | 26.50                 | 14.51                 | -                     | 41.05 | 70.11                                  | 84.86                                                   | 29.88                                                  | 15.13                                  |
| B60    | 36.6                     | 4.82                  | 0                     | 41.40    | 40.50                 | 18.10                 | -                     | 58.58 | 77.08                                  | 81.90                                                   | 22.92                                                  | 18.10                                  |
| B80    | 17.4                     | 1.58                  | 0                     | 19.90    | 61.18                 | 18.90                 | 0.91                  | 80.07 | 78.61                                  | 80.19                                                   | 20.47                                                  | 18.89                                  |

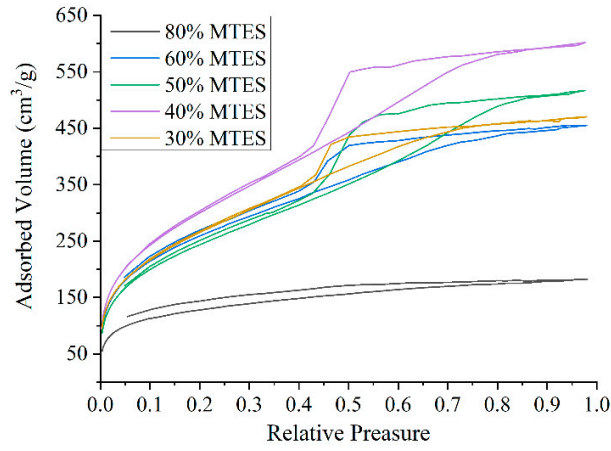

**Figure S1.** Evolution of nitrogen adsorption isotherms with 30-80% of MTES content.

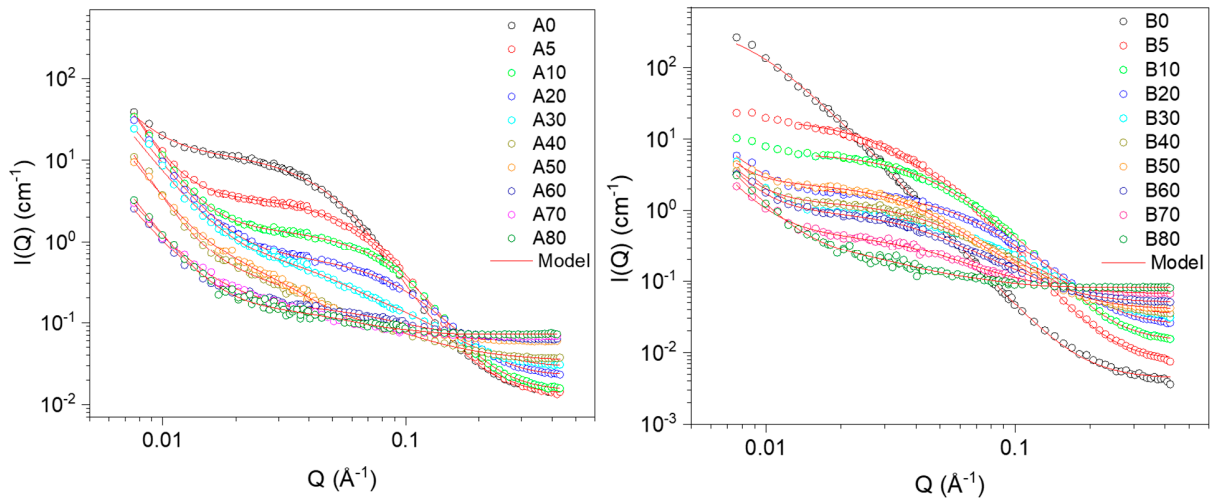

**Figure S2.** SANS profiles of series A (left) and B (right) as the amount of MTES in the reaction mixture increases from 5 % (A5/B5) up to 80 % (A80/B80). The SANS spectra of the TEOS silica precursor are also displayed for comparison (A0/B0). The applied model is also displayed as red lines.

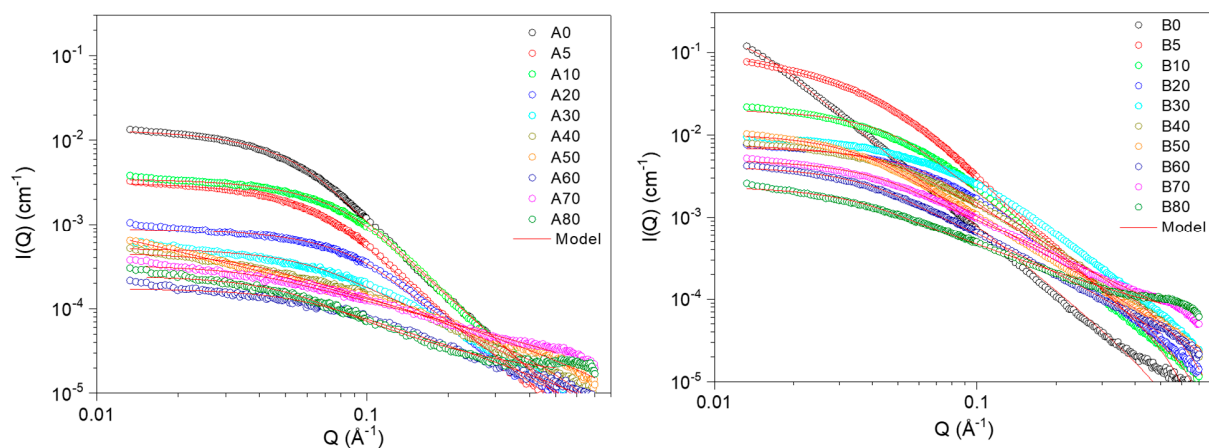

**Figure S3.** SAXS profiles obtained for series A (left) and B (right), as the amount of MTES in the reaction mixture increases from 5 % (A5/B5) up to 80 % (A80/B80). The SAXS spectra of the TEOS silica precursor are also displayed for comparison (A0/B0). The applied model is also displayed as red lines.

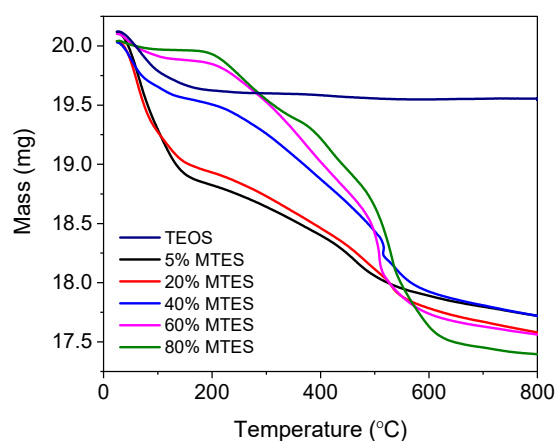

**Figure S4.** TG curves of the silica xerogels with different methyl content

| MTES<br>cont<br>ent (%) | series A    |        | series B    |        |
|-------------------------|-------------|--------|-------------|--------|
|                         | as-received | ground | as-received | ground |
| 0                       |             |        |             |        |

|    |                                                                                     |                                                                                     |                                                                                      |                                                                                       |
|----|-------------------------------------------------------------------------------------|-------------------------------------------------------------------------------------|--------------------------------------------------------------------------------------|---------------------------------------------------------------------------------------|
| 5  |    |    |    |    |
| 10 | (no data)                                                                           |    |    | (no data)                                                                             |
| 20 |    |    |    |    |
| 30 |   |   |   |   |
| 40 |  |  |  |  |
| 50 |  |  |  |  |
| 60 |  |  |  |  |
| 70 |  |  |  |  |

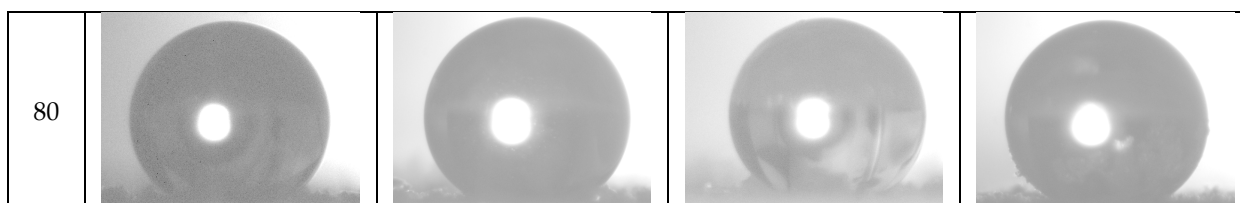

**Figure S5.** Representative contact angle images, one for each sample type, series A, respectively B, both as-received and ground.

#### Mathematical modelling of drug release

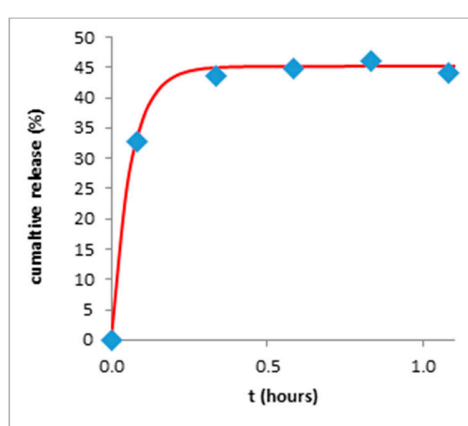

**Figure S6.** Fitted drug release curve of carrier A40 silica measured in HCl medium.
